# Supplementary material for: Photorhabdus antibacterial Rhs polymorphic toxin inhibits translation through ADP-ribosylation of 23S ribosomal RNA
Source: PubMed Central journal article supplement — Nucleic Acids Res. 2021 Jul 13;49(14):8384–95. doi: 10.1093/nar/gkab608 (PMC8661411; doi:10.1093/nar/gkab608), 2021-07-13
Supplement: gkab608_supplemental_file.pdf [file gkab608_supplemental_file.pdf]

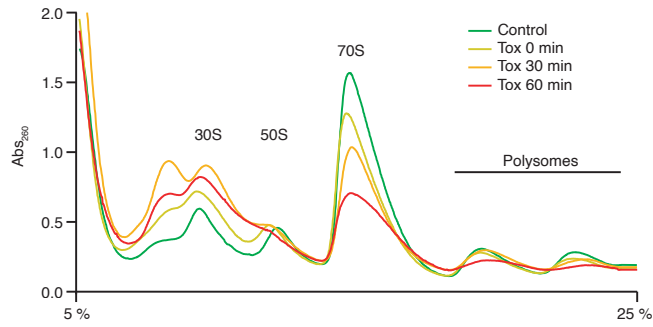

**Supplementary Figure 2. Tre23 reduces the fraction of actively translating ribosomes.** Polysome analysis of *E. coli* cells harboring the empty vector (green line) or producing Tre23 at time 0 (yellow line), 30 (orange line) or 60 min (red line) post-induction. Cell lysates were resolved by ultracentrifugation on 5-25% sucrose gradients and detected at  $A_{260}$ . The positions of the 30S, 50S, 70S and polysomes peaks are indicated on top.

**Supplemental Table S1. Strains and Plasmids used in this study.**

| Strains                       | Description and genotype                                                                                                      | Source/References     |
|-------------------------------|-------------------------------------------------------------------------------------------------------------------------------|-----------------------|
| <i>Escherichia coli</i> K12   |                                                                                                                               |                       |
| DH5 $\alpha$                  | F-, $\Delta$ ( <i>argF-lac</i> )U169 <i>phoA supE44 lacZ</i> $\Delta$ M15 <i>recA relA endA thi hsdR gyr</i>                  | Laboratory collection |
| BW25113                       | F-, $\Delta$ ( <i>araBAD</i> ) <i>lacZ</i> (del):: <i>rrnB</i> -3 <i>rph1</i> $\Delta$ ( <i>rhaD-rhaB</i> ) <i>hsdR</i>       | Barry Wanner          |
| BL21(DE3)                     | <i>dcm ompT hsdS gal <math>\lambda</math>DE3</i>                                                                              | Laboratory collection |
| WM3064                        | <i>thrB pro thi rpsL hsdS lacZ</i> $\Delta$ M15 RP4- $\Delta$ ( <i>araBAD</i> ) $\Delta$ <i>dapA</i> ::[ <i>erm</i> pir (wt)] | (1)                   |
| MRE600                        | <i>rna, hsdM</i> pColE1                                                                                                       | (2)                   |
| <i>Photorhabdus laumondii</i> |                                                                                                                               |                       |
| TT01                          | WT <i>Photorhabdus laumondii</i>                                                                                              | (3)                   |
| TT01-contr.                   | Cam_Plac_GFP cassette (from pJQ200- <i>glm-rpm</i> ) inserted at <i>glmS/rpmE</i> locus in TT01                               | (4)                   |
| TT01- $\Delta P_{T6SS}$       | Replacement of the T6SS-1 promoter region by the Cam_Plac_GFP cassette (from pJQ200- $\Delta P_{T6SS}$ ) locus in TT01        | This study            |
| TT01- $\Delta P_{T6SS}$       | Replacement of the T6SS-1 <i>tre23-tri23</i> by the Cam_Plac_GFP cassette (from pJQ200- $\Delta$ MutEff) locus in TT01        | This study            |
| MRE600                        | <i>rna, hsdM</i> pColE1                                                                                                       | (2)                   |
| Plasmid                       | Description and main characteristics                                                                                          | Source/References     |
| pJQ200                        | Mobilizable vector, suicide in <i>P. laumondii</i> , Gm <sup>R</sup>                                                          | (5)                   |
| pJQ200- <i>glm-rpm</i>        | pJQ200 vector to insert Cam_Plac_GFP cassette into the <i>glmS/rpmE</i> locus by homologous recombination                     | (4)                   |
| pJQ200- $\Delta P_{T6SS}$     | pJQ200 vector to exchange the T6SS-1 promoter by the Cam_Plac_GFP cassette by homologous recombination                        | This study            |
| pJQ200- $\Delta$ MutEff       | pJQ200 vector to exchange <i>tre23-tri23</i> by the Cam_Plac_GFP cassette by homologous recombination                         | This study            |
| pBAD33                        | Expression vector, AraC, arabinose-inducible, Cm <sup>R</sup>                                                                 | (6)                   |
| pBAD-Tre23                    | <i>P. laumondii tre23</i> (corresponding to Rhs amino-acids 1343-1471) cloned into pBAD33                                     | This study            |
| pBAD-Tre23-H8A                | His8-to-Ala (His-1350 in Rhs) substitution in pBAD-Tre23                                                                      | This study            |
| pBAD-Tre23-Y33A               | Tyr33-to-Ala (Tyr-1375 in Rhs) substitution in pBAD-Tre23                                                                     | This study            |
| pBAD-Tre23-HY                 | Tyr33-to-Ala substitution in pBAD-Tre23-H8A                                                                                   | This study            |
| pBAD-Tri23                    | <i>P. laumondii tri23</i> ( <i>plu0352</i> ) cloned into pBAD33                                                               | This study            |
| pNDM220                       | Mini-R1, single-copy vector, LaqI <sup>q</sup> , P <sub>A1/04/03</sub> , Amp <sup>R</sup>                                     | (7)                   |
| pNDM-Tre23                    | <i>P. laumondii tre23</i> (corresponding to Rhs amino-acids 1343-1471) cloned into pNDM220                                    | This study            |
| pET-Duet1                     | pBR322 ColE1 <i>ori</i> , T7 promoter, Amp <sup>R</sup>                                                                       | Novagen               |

|                  |                                                                                                                                                                        |            |
|------------------|------------------------------------------------------------------------------------------------------------------------------------------------------------------------|------------|
| pET-His-VgrG     | <i>P. laumondiis vgrG</i> gene ( <i>plu0355</i> ) under pT7 control in pET-Duet1, N-terminal 6×His tag, TEV cleavage                                                   | This study |
| pRSF-Duet1       | RSF1030 (NTP1) <i>ori</i> , T7 promoter, Kan <sup>R</sup>                                                                                                              | Novagen    |
| pRSF-EagR-ST     | <i>P. laumondii eagR</i> gene ( <i>plu0354</i> ) under pT7 control in pRSF-Duet1, C-terminal Strep-tag                                                                 | This study |
| pCDF-Duet1       | CloDF13 <i>ori</i> , T7 promoter, Strep <sup>R</sup>                                                                                                                   | Novagen    |
| pCDF-Rhs*-FL     | <i>P. laumondii rhs</i> gene ( <i>plu0353</i> ) under pT7 control in pCDF-Duet1, C-terminal FLAG tag, Tyr1351-to-Ala, Tyr1375-to-Ala, and Asp1338-to-Asn substitutions | This study |
| pPJ23104-gfp-lva | <i>GFP-lva</i> cloned under synthetic constitutive promoter in pBAD33, Cm <sup>R</sup>                                                                                 | This study |

| Oligonucleotide | Sequence (5' to 3') | Purpose |
|-----------------|---------------------|---------|
|-----------------|---------------------|---------|

| Construction of mutations in <i>Photorhabdus</i> <sup>a</sup> |  |  |
|---------------------------------------------------------------|--|--|
|---------------------------------------------------------------|--|--|

|                          |                                            |                                                                            |
|--------------------------|--------------------------------------------|----------------------------------------------------------------------------|
| MutClus_Left_F_Sall      | GTGCGT <b>CG</b> ACCTGACGCTCTTTCCAGGAAC    | amplify flanking regions for T6SS promoter mutation in <i>Photorhabdus</i> |
| MutClus_Left_R_AatII     | GTGCG <b>ACG</b> TCGCTGGAATCATCATGGCGTT    | amplify flanking regions for T6SS promoter mutation in <i>Photorhabdus</i> |
| MutClus_Right_F_SacI     | GCGT <b>GAG</b> CTCACTGTCTTCAACTTCTTTCAGCT | amplify flanking regions for T6SS promoter mutation in <i>Photorhabdus</i> |
| MutClus_Right_R_SpeI     | GCGT <b>ACTAG</b> TTCTTCACGCAAACTCTGGC     | amplify flanking regions for T6SS promoter mutation in <i>Photorhabdus</i> |
| MutEff_Left_F_Sall       | GTGCGT <b>CG</b> ACTTCAACCGGTTCCATATGAA    | amplify flanking regions for Tre23-Tri23 mutation in <i>Photorhabdus</i>   |
| MutEff_Left_R_AatII      | GTGCG <b>ACG</b> TCTTAATAATTAACAAAGCCGG    | amplify flanking regions for Tre23-Tri23 mutation in <i>Photorhabdus</i>   |
| MutEff_Right_F_SacI      | GCGT <b>GAG</b> CTCGGTCCGGTTCTTTCATCCA     | amplify flanking regions for Tre23-Tri23 mutation in <i>Photorhabdus</i>   |
| MutEff_Right_R_SpeI      | GCGT <b>ACTAG</b> TCGTCATCCGCCTCAAAGAG     | amplify flanking regions for Tre23-Tri23 mutation in <i>Photorhabdus</i>   |
| VerMutT6SS_PlumEff_LFwd  | GAGAGCATGAGATGACAATAGCC                    | check mutations in <i>Photorhabdus</i> genome                              |
| VerMutT6SS_PlumEff_RRev  | CAGGGAATTCAGGGGGTATT                       | check mutations in <i>Photorhabdus</i> genome                              |
| VerMutT6SS_PlumClus_LFwd | TGTTTCAGCCAGGTGTTTCAG                      | check mutations in <i>Photorhabdus</i> genome                              |
| VerMutT6SS_PlumClus_RRev | TCAGTGGTGGCAATTGTGAT                       | check mutations in <i>Photorhabdus</i> genome                              |
| VerMutT6SS_LRevCam       | TGCTCATGGAAAACGGTGTA                       | check mutations in <i>Photorhabdus</i> genome                              |
| VerMutT6SS_RFwdGFP       | CCACACAATCTGCCCTTTCC                       | check mutations in <i>Photorhabdus</i> genome                              |

| Plasmid construction <sup>a,b</sup> |  |  |
|-------------------------------------|--|--|
|-------------------------------------|--|--|

|               |                                                  |                                                       |
|---------------|--------------------------------------------------|-------------------------------------------------------|
| R-pBAD-SD-Sal | GATCAGT <b>CG</b> ACCCTCCTTCTAGAGGATCCCCGGGTACCG | introduce synthetic ribosome binding site into pBAD33 |
|---------------|--------------------------------------------------|-------------------------------------------------------|

|                   |                                                                                     |                                                                                                                                   |
|-------------------|-------------------------------------------------------------------------------------|-----------------------------------------------------------------------------------------------------------------------------------|
| F-pBAD-MCS        | CTGCAGGCATGCAAGCTTGGC                                                               | introduce synthetic ribosome binding site into pBAD33                                                                             |
| F-plART-sal       | GACTGTCGACATGGCTGGTGAAAATGTATTTATTTCAC                                              | clone <i>tre23</i> into pBAD33 through <i>SalI</i> and <i>HindIII</i> sites                                                       |
| R-plART-hind      | GACTAAGCTTTTATTTTCCTCCGCACTTTCTG                                                    | clone <i>tre23</i> into pBAD33 through <i>SalI</i> and <i>HindIII</i> sites                                                       |
| F-imART-Sal       | GACTGTCGACATGAAGCACGAATCTATTCAA                                                     | clone <i>tri23</i> into pBAD33 through <i>SalI</i> and <i>HindIII</i> sites                                                       |
| R-A-plART-hind    | GACTAAGCTTCTACCACTTATATGGATATGCATG                                                  | clone <i>tri23</i> into pBAD33 through <i>SalI</i> and <i>HindIII</i> sites                                                       |
| F-pBAD-bam        | ACCCGGGGATCCTCTAGAAG                                                                | amplify <i>tre23</i> from pBAD33 with RBS and clone into pNDM220 through <i>BamHI</i> and <i>EcoRI</i> sites                      |
| R-pBAD-eco        | CAGTGAATTCCCGCCAAAACAGCCAAGCTT                                                      | amplify <i>tre23</i> from pBAD33 with RBS and clone into pNDM220 through <i>BamHI</i> and <i>EcoRI</i> sites                      |
| F-gfp-eco         | ATGCGAATTCATGAGTAAAGGAGAAGAACTTTTCAC                                                | clone <i>gfp-lva</i> through <i>EcoRI</i> and <i>HindIII</i> in pBAD33                                                            |
| R-GFP-LVA-Hind    | GGCCAAGCTTTTAAGCTACTAAAGCGTAGTTTT                                                   | clone <i>gfp-lva</i> through <i>EcoRI</i> and <i>HindIII</i> in pBAD33                                                            |
| R-pBAD-sac        | GGAGGAGCTCTTGGTAACGAATCAGACAAT                                                      | remove <i>araC</i> and <i>ara</i> promoter and introduce synthetic promoter J23104 in front of <i>gfp-lva</i> into pBAD33-GFP-LVA |
| F-p33-J32104      | TTGACAGCTAGCTCAGTCCTAGGTATTGTGCTAGCACCCGTTTTTTTTGGGCTA                              | remove <i>araC</i> and <i>ara</i> promoter and introduce synthetic promoter J23104 in front of <i>gfp-lva</i> into pBAD33-GFP-LVA |
| F-pETd-synth      | GCCAGGATCCGAATTCGAGCTC                                                              | introduce TEV protease site after 6×His-tag and <i>BmtI</i> site for in frame cloning                                             |
| R-pETd-tev-bmt    | ACAAGCTAGCGCCCTGGAAGTACAGGTTTTTCGTGGTGATGATGGTGATGGCTGCTG                           | introduce TEV protease site after 6×His-tag and <i>BmtI</i> site for in frame cloning                                             |
| F-pRSFd-strep-sal | GACTGTCGACTGGAGCCACCCGCAGTTCGAAAAATAAAAGCTTGCGGCCGCATAATGC                          | introduce Streptag for in frame cloning at the C terminus                                                                         |
| F-pACYCd-flag-sal | GATCGTCGACGATTACAAGGACGACGATGACAAGTAAAAGCTTGCGGCCGCATAATG                           | introduce FLAG tag for in frame cloning at the C terminus                                                                         |
| R-pRSF-sac        | GATCGAGCTCCTCCTTATTAAAGTTAAACAAAATTATTTCTACAGGGG                                    | amplify Duet1 vectors for cloning in fusion with Strep of FLAG tags at the C terminus                                             |
| R-duet-strepTEV   | ACTGGAGCTCAGACTGGAAGTACAGGTTTTCTTTTTCGAACTGCGGGTGGCTCCACATGGTATATCTCCTTATTA<br>AAGT | amplify Duet1 vectors for cloning with Streptag and TEV protease cleavage site at the N terminus                                  |
| F-duet-sal        | CATGGTCGACTAATGCTTAAGTCGAACAGAAA                                                    | amplify Duet1 vectors for cloning with Streptag and TEV protease cleavage site at the N terminus                                  |

|                  |                                    |                                                                                                                                                                                                  |
|------------------|------------------------------------|--------------------------------------------------------------------------------------------------------------------------------------------------------------------------------------------------|
| F-plVgrG-bmt     | GGGCGCTAGCTCATTTCAGAAAAAACCGCCA    | clone <i>vgrG</i> into pET-Duet1 through <i>BmtI</i> and <i>HindIII</i> sites fusing to 6×His-TEV site at the N terminus                                                                         |
| R-plVgrG-hind    | GACTAAGCTTTCAGTTCACATTGACCTGTTTG   | clone <i>vgrG</i> into pET-Duet1 through <i>BmtI</i> and <i>HindIII</i> sites fusing to 6×His-TEV site at the N terminus                                                                         |
| F-pl1795-Sac     | GGAGGAGCTCATGGAAAACACAACCTATCAGA   | clone <i>eagR</i> into pRSF-Duet1 through <i>SacI</i> and <i>SalI</i> sites fusing to Streptag at the C terminus                                                                                 |
| R-pl1795-Sal     | GATCGTTCGACGGCTGCCTGAAAAGTGTGGA    | clone <i>eagR</i> into pRSF-Duet1 through <i>SacI</i> and <i>SalI</i> sites fusing to Streptag at the C terminus                                                                                 |
| F-plRhs-Sac      | GGAGGAGCTCATGTCACTTGGTGATGAAATCG   | clone <i>rhs</i> into pCDF-Duet1 through <i>SacI</i> and <i>SalI</i> sites fusing to FLAG tag at the C terminus                                                                                  |
| R-plRhs-Sal      | GATCGTTCGACTTTTCCTCCGCACTTTCTGATT  | clone <i>rhs</i> into pCDF-Duet1 through <i>SacI</i> and <i>SalI</i> sites fusing to FLAG tag at the C terminus                                                                                  |
| F-pl-Imm-Sac     | GGAGGAGCTCATGAAGCACGAATCTATTCAATT  | clone <i>tri23</i> immunity protein into pCDF-Duet1 through <i>SacI</i> and <i>SalI</i> sites in fusion with Streptag and TEV cleavage site at the N terminus                                    |
| R-pl-Imm-Sal     | GATCGTTCGACCCACTTATATGGATATGCAT    | clone <i>tri23</i> immunity protein into pCDF-Duet1 through <i>SacI</i> and <i>SalI</i> sites in fusion with Streptag and TEV cleavage site at the N terminus or with Streptag at the C terminus |
| R-pl-ART-ATG-Sac | CATGGAGCTCATGGCTGGTGAAAATGTATTTATT | in pair with above indicated R-plRhs-Sal, to clone Tre23 toxic protein domain into pRSF-Duet1 through <i>SacI</i> and <i>SalI</i> sites in fusion with Streptag at the C terminus                |

#### Site directed mutagenesis<sup>c</sup>

|                |                                |                                                                 |
|----------------|--------------------------------|-----------------------------------------------------------------|
| F-plART-H8A    | GCGTATACAAATAAAGCGGGTTTTG      | introduce H8A substitution in <i>tre23</i>                      |
| R-plART-H8     | AATAAATACATTTTCACCAGCC         | introduce H8A substitution in <i>tre23</i>                      |
| F-plART-Y9A    | GCGACAAATAAAGCGGGTTTTGAC       | introduce Y1351A substitution in <i>rhs</i> (Y9A at the Tre23)  |
| R-plART-Y9     | GTGAATAAATACATTTTCACCAGC       | introduce Y1351A substitution in <i>rhs</i> (Y9A at the Tre23)  |
| F-plART-Y33A   | GCGATAACGGATGTACTAATGTCTC      | introduce Y1375A substitution in <i>rhs</i> (Y33A at the Tre23) |
| R-plART-Y33    | AACTTTTCCACTGACGTTTG           | introduce Y1375A substitution in <i>rhs</i> (Y33A at the Tre23) |
| F-plRhs-D1338N | AACCCTCTAGGGCTTGCTGGT          | introduce D1338N substitution in <i>rhs</i>                     |
| R-plRhs-D1338  | AATAAATTTTCGTGGGATTTTGCACATAGC | introduce D1338N substitution in <i>rhs</i>                     |

### DNA fragments for *in vitro* transcription-translation<sup>b</sup>

|                   |                                                                                      |                                                                      |
|-------------------|--------------------------------------------------------------------------------------|----------------------------------------------------------------------|
| 3'UTR-plART       | GCGAATTAATACGACTCACTATAGGGCTTAAGTATAAGGAGGAAAAAATATGGCTGGTGAAAATGTATT                | amplify DNA fragment for <i>in vitro</i> synthesis of Tre23-Streptag |
| 5'UTR-plART-strep | AAACCCCTCCGTTTAGAGAGGGGTTATGCTAGTTATTATTTTTCGAACTGCGGGTGGCTCCATTTTCCTCCGCACTTTCTGA   | amplify DNA fragment for <i>in vitro</i> synthesis of Tre23-Streptag |
| 5'UTR-GFP         | GCGAATTAATACGACTCACTATAGGGCTTAAGTATAAGGAGGAAAAAATATGAGTAAAGGAGAAGAACTTTTCAC          | amplify DNA fragment for <i>in vitro</i> synthesis of GFP-Streptag   |
| 3'UTR-GFP-strep   | AAACCCCTCCGTTTAGAGAGGGGTTATGCTAGTTATTATTTTTCGAACTGCGGGTGGCTCCATTTGTATAGTTCATCCATGCCA | amplify DNA fragment for <i>in vitro</i> synthesis of GFP-Streptag   |

### rRNA library construction<sup>a</sup>

|                        |                                |                                                                                   |
|------------------------|--------------------------------|-----------------------------------------------------------------------------------|
| Universal miRNA Linker | rAppCTGTAGGCACCATCAAT-NH2      | Universal miRNA Cloning linker (NEB)                                              |
| RT-uni-NEB-Hind        | AGCCAAGCTTATTGATGGTGCCTACAG    | Reverse transcription against universal cloning linker                            |
| ss-linker              | pACTCTCTACTGTTTCTCCAT          | second linker ligated to copy DNA                                                 |
| F-sslinker-Eco         | GGAGGAATTCATGGAGAAACAGTAGAGAGT | PCR primer to amplify copy DNA ligated to linkers, introduces <i>EcoRI</i> site   |
| R-NEB-Hind             | AGCCAAGCTTATTGATGGTG           | PCR primer to amplify copy DNA ligated to linkers, introduces <i>HindIII</i> site |
| F-pKK-seq              | GCACTCCCGTTCTGGATAAT           | universal pKK223.3 oligo for sequencing                                           |
| R-pKK-seq              | GTTTCACTTCTGAGTTCGGCATG        | universal pKK223.3 oligo for sequencing                                           |

### Hybridization to 23S fragments

|              |                                           |                                            |
|--------------|-------------------------------------------|--------------------------------------------|
| SRL-control  | TCCACTCCGGTCTCTCGTACTAGGAGCAG             | hybridizes to 2647-2676 nucleotides of 23S |
| 23S-lib-L    | AAATGATGGCTGCTTCTAAGCCAACATCCTGGCTGTCTGGG | hybridizes to 1043-1083 nucleotides of 23S |
| 23S-lib-R    | CGCGCAGGCCGACTCGACCAGTGAGCTATTACGCTTTCTTT | hybridizes to 1084-1124 nucleotides of 23S |
| 23S-from1093 | CGCAGGCCGACTCGACCAGTGAGCTATTAC            | hybridizes to 1093-1122 nucleotides of 23S |
| 23S-from1095 | CGCGCAGGCCGACTCGACCAGTGAGCTATT            | hybridizes to 1095-1124 nucleotides of 23S |
| 23S-from1099 | CTTCCGCGCAGGCCGACTCGACCAGTGAGC            | hybridizes to 1099-1128 nucleotides of 23S |

<sup>a</sup> Restriction site in bold.

<sup>b</sup> 6×His-, Strep- or FLAG-coding sequence italicized.

<sup>c</sup> introduced mutation underlined.

## References

1. Løbner-Olesen,A. and von Freiesleben,U. (1996) Chromosomal replication incompatibility in Dam methyltransferase deficient Escherichia coli cells. *EMBO J*, **15**, 5999–6008.
2. Kurylo,C.M., Alexander,N., Dass,R.A., Parks,M.M., Altman,R.A., Vincent,C.T., Mason,C.E. and Blanchard,S.C. (2016) Genome Sequence and Analysis of Escherichia coli MRE600, a Colicinogenic, Nonmotile Strain that Lacks RNase I and the Type I Methyltransferase, EcoKI. *Genome Biol Evol*, **8**, 742–752.
3. Duchaud,E., Rusniok,C., Frangeul,L., Buchrieser,C., Givaudan,A., Taourit,S., Bocs,S., Boursaux-Eude,C., Chandler,M., Charles,J.-F., *et al.* (2003) The genome sequence of the entomopathogenic bacterium *Photorhabdus luminescens*. *Nat Biotechnol*, **21**, 1307–1313.
4. Payelleville,A., Blackburn,D., Lanois,A., Pagès,S., Cambon,M.C., Ginibre,N., Clarke,D.J., Givaudan,A. and Brillard,J. (2019) Role of the *Photorhabdus* Dam methyltransferase during interactions with its invertebrate hosts. *PLoS One*, **14**, e0212655.
5. Quandt,J. and Hynes,M.F. (1993) Versatile suicide vectors which allow direct selection for gene replacement in gram-negative bacteria. *Gene*, **127**, 15–21.
6. Guzman,L.M., Belin,D., Carson,M.J. and Beckwith,J. (1995) Tight regulation, modulation, and high-level expression by vectors containing the arabinose PBAD promoter. *J Bacteriol*, **177**, 4121–4130.
7. Gotfredsen,M. and Gerdes,K. (1998) The Escherichia coli relBE genes belong to a new toxin-antitoxin gene family. *Mol Microbiol*, **29**, 1065–1076.
